# Supplementary material
Source: PubMed Central journal article supplement (PMC3425135)
Supplement: Supp_Fig1.pdf [file Supp_Fig1.pdf]

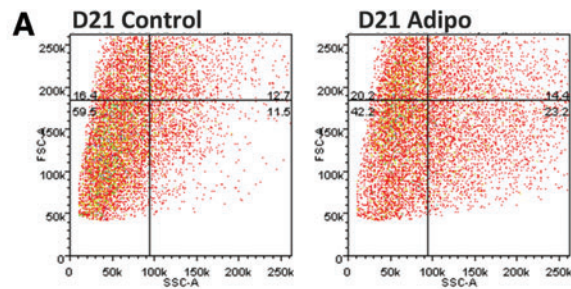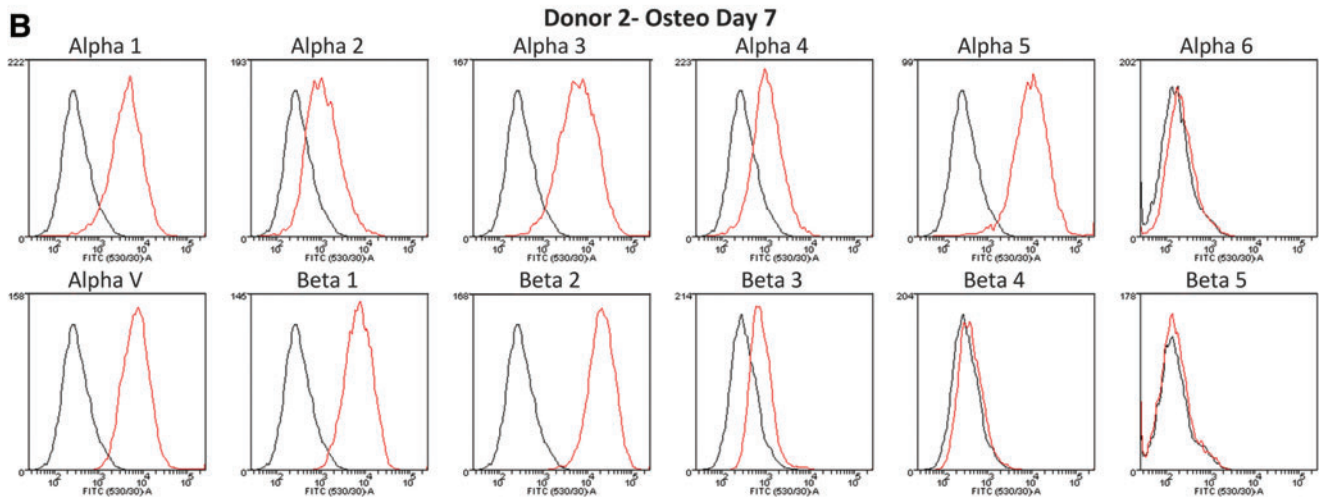

**SUPPLEMENTARY FIG. S1.** (A) Flow cytometry analysis of hMSC-derived adipocytes. Dot plots displaying the forward and side scatter properties of the day-21 control hMSCs and the day-21 hMSC-derived adipocytes. (B) An example of flow cytometric data after 7 days of culture in osteogenic differentiation conditions. Profiles show isotype controls (*black*) and antibody staining (*red*). Histograms displayed are from donor 2 and are representative of other results obtained. hMSCs, human bone marrow-derived mesenchymal stem cells.
