# Supplementary material
Source: PubMed Central journal article supplement (PMC3425135)
Supplement: Supp_Fig2.pdf [file Supp_Fig2.pdf]

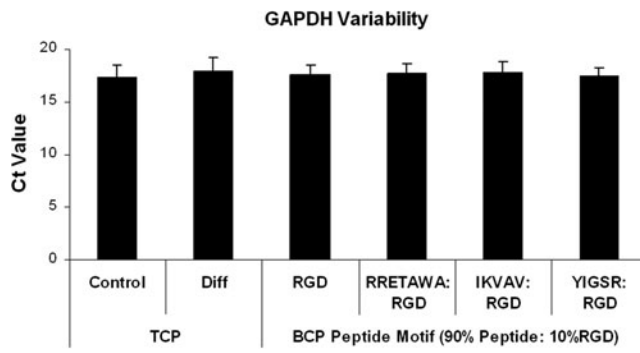

**SUPPLEMENTARY FIG. S2.** Average GAPDH *Ct* values for 3 donors in all conditions. Statistical significance was determined by one-way ANOVA; \* $P < 0.05$ . ANOVA, analysis of variance.
