# Supplementary material
Source: PubMed Central journal article supplement (PMC3425135)
Supplement: Supp_Fig3.pdf [file Supp_Fig3.pdf]

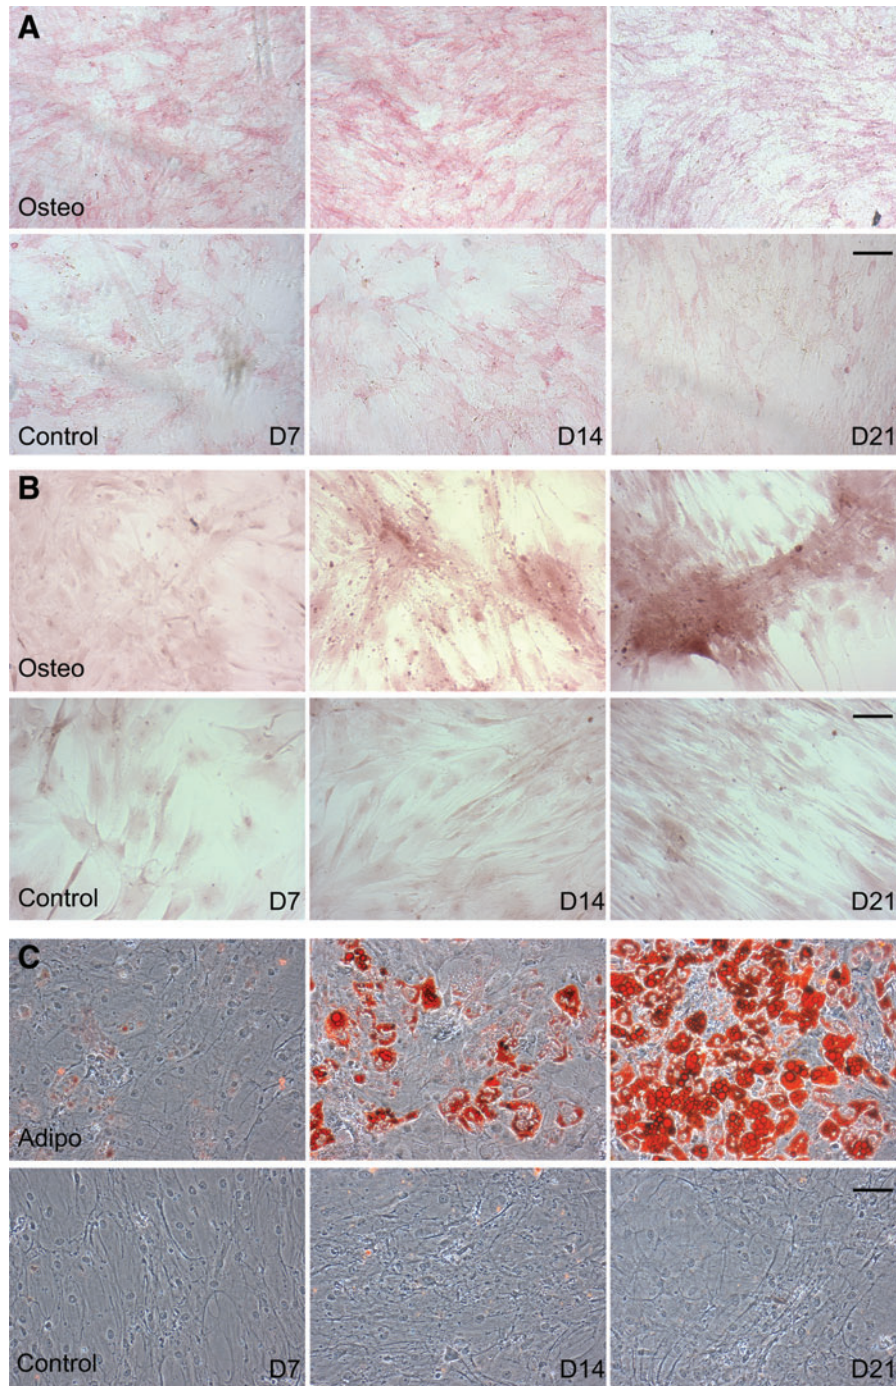

**SUPPLEMENTARY FIG. S3.** Staining of differentiation controls showing (A) alkaline phosphatase (*pink*) and (B) Alizarin red staining of osteogenic hMSCs and (C) Oil Red O staining (*red*) of adipogenic hMSCs after 7, 14, and 21 days of differentiation. Scale bars represent 100  $\mu\text{m}$ .
