# Supplementary material
Source: PubMed Central journal article supplement (PMC3425135)
Supplement: Supp_Fig4.pdf [file Supp_Fig4.pdf]

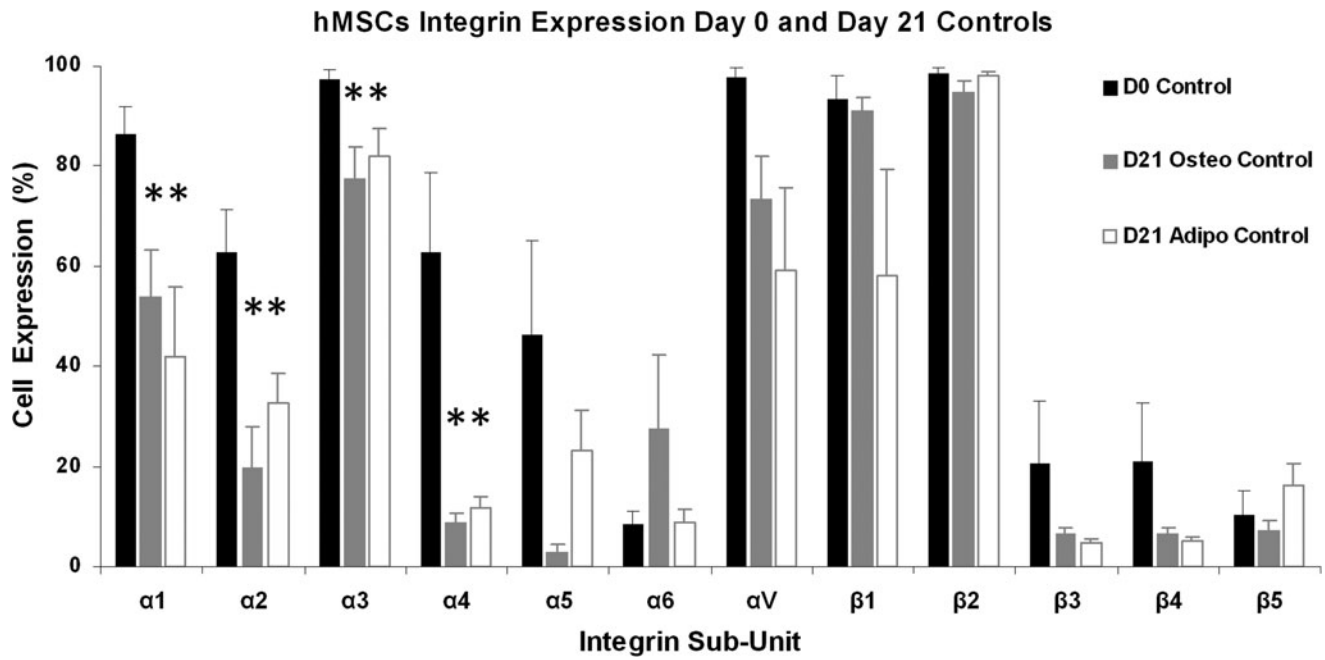

**SUPPLEMENTARY FIG. S4.** Integrin expression of naive hMSCs and after 21 days in standard culture media. The mean percentage of the hMSC population expressing each integrin subunit is shown ( $\pm$  standard deviation) for naive hMSCs and post 21 days in control media, from at least 3 independent donors. Statistical significance was determined by one-way ANOVA; \* $P < 0.05$ .
