# Supplementary material
Source: PubMed Central journal article supplement (PMC3425135)
Supplement: Supp_Fig5.pdf [file Supp_Fig5.pdf]

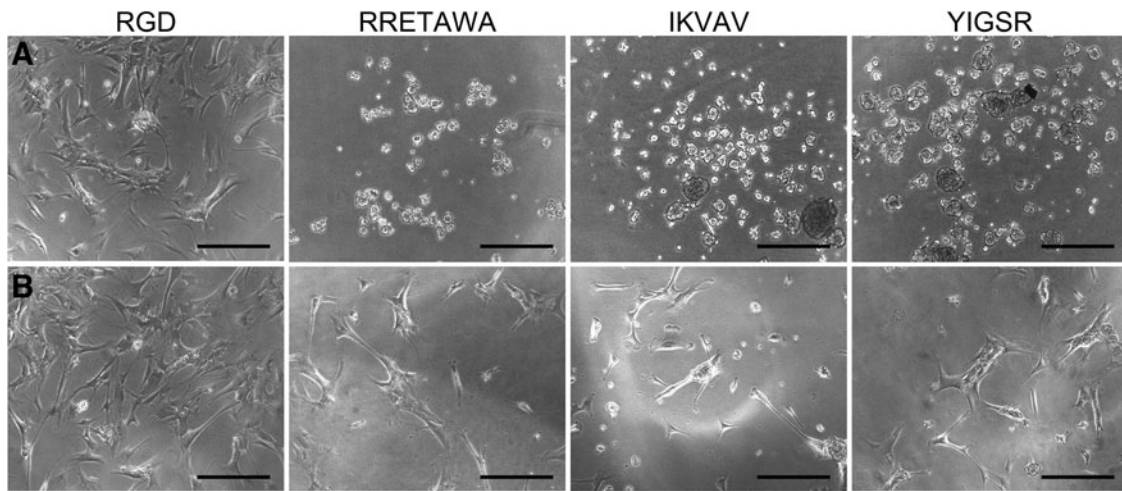

**SUPPLEMENTARY FIG. S5.** Photomicrographs of hMSCs on surfaces presenting single extracellular matrix (ESM) peptides (**A**) and surfaces prepared with the addition of 10% RGD (**B**) after 48 h of culture. Scale bar represents 200  $\mu\text{m}$ .
