# Supplementary material
Source: PubMed Central journal article supplement (PMC3425135)
Supplement: Supp_Table1.pdf [file Supp_Table1.pdf]

SUPPLEMENTARY TABLE S1. PERCENTAGE EXPRESSION OF INTEGRIN SUBUNITS DURING OSTEOGENIC DIFFERENTIATION

| <i>Average ±SD</i> | <i>Day 0</i> | <i>Day 7</i> | <i>Day 14</i> | <i>Day 21</i> |
|--------------------|--------------|--------------|---------------|---------------|
| α1                 | 86±13        | 98±1         | 95±5          | 95±1          |
| α2                 | 60±20        | 62±24        | 18±4          | 16±9          |
| α3                 | 97±4         | 98±1         | 94±8          | 81±8          |
| α4                 | 54±32        | 63±27        | 17±7          | 15±4          |
| α5                 | 28±12        | 99±0         | 15±4          | 7±3           |
| α6                 | 6±2          | 9±3          | 26±15         | 23±4          |
| αV                 | 97±4         | 99±1         | 80±12         | 82±24         |
| β1                 | 98±1         | 100±0        | 93±7          | 92±9          |
| β2                 | 98±2         | 100±0        | 100±0         | 93±4          |
| β3                 | 25±29        | 39±24        | 5±2           | 8±6           |
| β4                 | 24±28        | 23±27        | 6±1           | 7±2           |
| β5                 | 6±2          | 4±0          | 4±2           | 12±7          |

Mean percentage expression ±SD for hMSCs from 3 independent donors after 7, 14, and 21 days of osteogenic differentiation.  
hMSCs, human bone marrow-derived mesenchymal stem cells.  
SD, standard deviation.
