# Supplementary material
Source: PubMed Central journal article supplement (PMC3425135)
Supplement: Supp_Table2.pdf [file Supp_Table2.pdf]

SUPPLEMENTARY TABLE S2. PERCENTAGE EXPRESSION OF INTEGRIN SUBUNITS DURING ADIPOGENIC DIFFERENTIATION

| <i>Average ± SD</i> | <i>Day 0</i> | <i>Day 7</i> | <i>Day 14</i> | <i>Day 21</i> |
|---------------------|--------------|--------------|---------------|---------------|
| $\alpha 1$          | 87 ± 11      | 79 ± 21      | 57 ± 40       | 64 ± 38       |
| $\alpha 2$          | 63 ± 17      | 35 ± 17      | 25 ± 6        | 30 ± 6        |
| $\alpha 3$          | 98 ± 3       | 72 ± 23      | 59 ± 18       | 65 ± 11       |
| $\alpha 4$          | 63 ± 32      | 25 ± 26      | 11 ± 4        | 15 ± 9        |
| $\alpha 5$          | 46 ± 37      | 76 ± 22      | 67 ± 23       | 63 ± 33       |
| $\alpha 6$          | 9 ± 5        | 12 ± 9       | 16 ± 2        | 21 ± 6        |
| $\alpha V$          | 98 ± 3       | 96 ± 5       | 92 ± 6        | 91 ± 8        |
| $\beta 1$           | 93 ± 10      | 43 ± 48      | 64 ± 29       | 68 ± 38       |
| $\beta 2$           | 99 ± 2       | 99 ± 2       | 97 ± 2        | 98 ± 2        |
| $\beta 3$           | 21 ± 25      | 7 ± 3        | 6 ± 1         | 6 ± 1         |
| $\beta 4$           | 21 ± 24      | 6 ± 2        | 6 ± 1         | 6 ± 1         |
| $\beta 5$           | 10 ± 10      | 25 ± 23      | 19 ± 16       | 15 ± 9        |

Mean percentage expression ± SD for hMSCs from 4 independent donors after 7, 14, and 21 days of adipogenic differentiation.
